# Supplementary material for: Personalised exercise rehabilitation in cancer survivorship: the percs triage and referral system study protocol
Source: Springer Nature journal article supplement (doi:10.1186/s12885-024-12266-x), 2024-04-23
Supplement: MOESM1 [file 27008074]

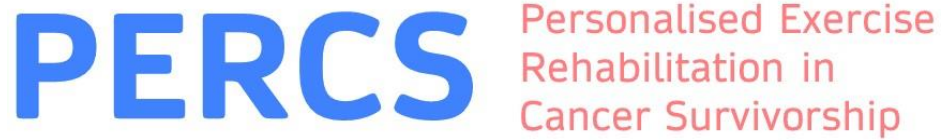

## Case Report Form

Trial Code:  
PERCS \_\_\_\_\_

**Study Contact Information:**

**Clinical Lead SJH:**

Dr Claire Donohoe, St. James's Hospital, Dublin

**Principal Investigator:**

Dr Emer Guinan, Assistant Professor, Dept of Clinical Medicine, Trinity College Dublin

**Study Contact:**

Dr Louise Brennan, Project Manager, Discipline of Surgery, Trinity Centre for Health Sciences, St. James's Hospital Dublin 8

Contact via email: [percs@tcd.ie](mailto:percs@tcd.ie) or phone: 087 090 2644

**Informed Consent**

|                            |  |
|----------------------------|--|
| Date Verbal Consent agreed |  |
| Date Consent Form signed   |  |

**Inclusion/ Exclusion Criteria**

| <b>Inclusion Criteria (patient can only participate with strictly “yes” answers)</b> |            |           |
|--------------------------------------------------------------------------------------|------------|-----------|
|                                                                                      | <b>Yes</b> | <b>No</b> |
| Diagnosed with cancer at St James’s Hospital since March 2020                        |            |           |
| Completion of adjuvant chemotherapy and/or radiotherapy                              |            |           |
| At least 6 weeks post-surgery                                                        |            |           |
| No signs of recurrent or metastatic disease at the time of enrolment                 |            |           |
| Over the age of 18 years                                                             |            |           |

| <b>Exclusion Criteria (patient can only participate with strictly “no” answers)</b>                                                                 |            |           |
|-----------------------------------------------------------------------------------------------------------------------------------------------------|------------|-----------|
|                                                                                                                                                     | <b>Yes</b> | <b>No</b> |
| Presence of any absolute contraindications to exercise as per American College of Sports Medicine preparticipation health screening recommendations |            |           |
| Unable to provide informed consent                                                                                                                  |            |           |

**Source of referral:**     Consultant     Cancer Specialist Nurse     Physiotherapist  
 Prehabilitation list     Other (please state) \_\_\_\_\_

**Accessibility needs identified:**  yes  no

Please state need and actions taken to enable inclusion:

---



---



---

## TO Assessment

Date: / /2023

### Participant Demographics

Age (years): \_\_\_\_\_

Gender:  Female  Male  Other \_\_\_\_\_

### Cancer & Medical History

Cancer details:

*Type*

*Month & year of diagnosis*

*Stage at diagnosis*

*Consultant*

Treatment received:

Surgery  Chemotherapy  Radiotherapy  Hormone  None  Other

Further hospital admissions

Details:

|                                                                                                                                                                                                                                                                                                                                                                       |                                                                                                                                                                                                                                                                                                                                                                                                                                                          |
|-----------------------------------------------------------------------------------------------------------------------------------------------------------------------------------------------------------------------------------------------------------------------------------------------------------------------------------------------------------------------|----------------------------------------------------------------------------------------------------------------------------------------------------------------------------------------------------------------------------------------------------------------------------------------------------------------------------------------------------------------------------------------------------------------------------------------------------------|
| <p>Cancer-related impairments</p> <p>Does participant have:</p> <p><input type="checkbox"/> Peripheral neuropathy</p> <p><input type="checkbox"/> Arthritis/musculoskeletal issues</p> <p><input type="checkbox"/> Poor bone health (e.g. osteopenia or osteoporosis)</p> <p><input type="checkbox"/> Lymphoedema</p> <p><input type="checkbox"/> Bone metastases</p> | <p><input type="checkbox"/> Lung or abdominal surgery</p> <p><input type="checkbox"/> Ostomy</p> <p><input type="checkbox"/> Cardiopulmonary disease</p> <p><input type="checkbox"/> Ataxia</p> <p><input type="checkbox"/> Extreme fatigue</p> <p><input type="checkbox"/> Severe nutritional deficiencies</p> <p><input type="checkbox"/> Worsening/changing physical condition</p> <p><input type="checkbox"/> Known haematological abnormalities</p> |
| <p>Details / Any other known complications of treatment:</p><br><br><br><br>                                                                                                                                                                                                                                                                                          |                                                                                                                                                                                                                                                                                                                                                                                                                                                          |

**Co-morbidities** *Provide details as required*

|                     |                                                                                                                                                                                                                                                                     |                                        |                                       |
|---------------------|---------------------------------------------------------------------------------------------------------------------------------------------------------------------------------------------------------------------------------------------------------------------|----------------------------------------|---------------------------------------|
| <b>Other cancer</b> | <input type="checkbox"/> No                                                                                                                                                                                                                                         | <input type="checkbox"/> Yes           |                                       |
| <b>Cardiac :</b>    | <input type="checkbox"/> MI                                                                                                                                                                                                                                         | <input type="checkbox"/> Valve Surgery | <input type="checkbox"/> Arrhythmias  |
|                     | <input type="checkbox"/> CABG                                                                                                                                                                                                                                       | <input type="checkbox"/> Pacemaker     | <input type="checkbox"/> Hypertension |
|                     | <input type="checkbox"/> Heart Failure                                                                                                                                                                                                                              | Other:                                 |                                       |
| <b>Respiratory:</b> | <input type="checkbox"/> COPD                                                                                                                                                                                                                                       | <input type="checkbox"/> Asthma        | Other:                                |
| <b>COVID-19</b>     | Has participant contracted COVID-19: <input type="checkbox"/> Yes <input type="checkbox"/> No<br>Has participant received COVID-19 vaccine: <input type="checkbox"/> Fully vaccinated <input type="checkbox"/> No<br><input type="checkbox"/> Other (Details below) |                                        |                                       |
| <b>Diabetes</b>     | <input type="checkbox"/> No                                                                                                                                                                                                                                         |                                        | <input type="checkbox"/> Yes , type 1 |
|                     | <input type="checkbox"/> Yes, Type 2: oral medication                                                                                                                                                                                                               |                                        |                                       |
|                     | <input type="checkbox"/> Yes, Type2: insulin dependent                                                                                                                                                                                                              |                                        |                                       |
|                     | <input type="checkbox"/> Yes, type 2: diet dependent                                                                                                                                                                                                                |                                        |                                       |
| <b>Neurological</b> | <input type="checkbox"/> No                                                                                                                                                                                                                                         | <input type="checkbox"/> Yes           |                                       |
| <b>Thyroid</b>      | <input type="checkbox"/> No                                                                                                                                                                                                                                         | <input type="checkbox"/> Yes           |                                       |

|                                                           |                                            |                                       |                 |
|-----------------------------------------------------------|--------------------------------------------|---------------------------------------|-----------------|
| <b>Orthopaedic</b>                                        | <input type="checkbox"/> Joint replacement | <input type="checkbox"/> Osteoporosis | Other:          |
| <b>Smoking:</b>                                           | <input type="checkbox"/> Never             | <input type="checkbox"/> Past Smoker  |                 |
|                                                           | <input type="checkbox"/> Current Smoker    | Amount smoked daily:                  |                 |
| <b>Alcohol:</b>                                           | <input type="checkbox"/> No                | <input type="checkbox"/> Yes          | Units per week: |
| <i>Please provide details of any above category here:</i> |                                            |                                       |                 |

Current medications

*Please include name and dose of all current medications*

|  |
|--|
|  |
|--|

Allergies

*Please specify*

|  |
|--|
|  |
|--|

### Symptoms and Survivorship Needs

Current symptoms

*e.g. Pain, fatigue, weakness, sleep difficulties, anxiety, low mood, poor balance, sensory changes, body composition changes, breathing difficulties, swallow/ eating/ digestion difficulties, sexual health issues, incontinence, cognitive problems, other psycho-social*

| Symptom | Timeframe | Other details: severity, rx to date, identify main problem |
|---------|-----------|------------------------------------------------------------|
|         |           |                                                            |

|  |  |  |
|--|--|--|
|  |  |  |
|  |  |  |
|  |  |  |

### Mobility and Function

Mobility and exercise  
*Current mobility, aids, activities or sports*

Premorbid mobility and exercise  
*Pre-cancer mobility, aids, activities or sports*

|  |  |
|--|--|
|  |  |
|--|--|

Falls History (past 12 months):

|  |
|--|
|  |
|--|

Social History

*Family, living circumstances, work, hobbies, other responsibilities or occupations*

|  |
|--|
|  |
|--|

Travel and accessibility (can be assisted by researcher calculations as needed)

|                                                                                  |  |
|----------------------------------------------------------------------------------|--|
| Distance in Km from home to St James’s Hospital (SJH):                           |  |
| Time in hours & minutes from home to SJH:                                        |  |
| Mode of transport to SJH:                                                        |  |
| Cost of getting to SJH:                                                          |  |
| Any indirect costs of getting to SJH:<br>(e.g. related to childcare, work, food) |  |

ACSM Recommended Exercise Guidelines

|                                                                                                                                                                                                                                                                                                                                                                                                                                                                                                                                                                                                                                      |
|--------------------------------------------------------------------------------------------------------------------------------------------------------------------------------------------------------------------------------------------------------------------------------------------------------------------------------------------------------------------------------------------------------------------------------------------------------------------------------------------------------------------------------------------------------------------------------------------------------------------------------------|
| <p><b>Aerobic:</b><br/> <i>“How many days in the past week have you performed physical activity where your heart beats faster and your breathing is harder than normal for 30 minutes or more?”</i></p> <p>Days per week engaged in <math>\geq 30</math> mins moderate intensity exercise: _____<br/>                 Details of exercise: _____</p> <p><b>Resistance:</b><br/> <i>“How many days during the past week have you performed physical activity to increase muscle strength such as lifting weights?”</i></p> <p>Days per week engaged in resistance exercise: _____<br/>                 Details of exercise: _____</p> |
| <p><b>Participant is meeting the recommended exercise guidelines:</b></p> <p><input type="checkbox"/> Yes   <input type="checkbox"/> No   (Aerobic <math>\geq 3</math> days; resistance <math>\geq 2</math> days)</p>                                                                                                                                                                                                                                                                                                                                                                                                                |

## INTERNATIONAL PHYSICAL ACTIVITY QUESTIONNAIRE

We are interested in finding out about the kinds of physical activities that people do as part of their everyday lives. The questions will ask you about the time you spent being physically active in the **last 7 days**. Please answer each question even if you do not consider yourself to be an active person. Please think about the activities you do at work, as part of your house and yard work, to get from place to place, and in your spare time for recreation, exercise or sport.

Think about all the **vigorous** activities that you did in the **last 7 days**. **Vigorous** physical activities refer to activities that take hard physical effort and make you breathe much harder than normal. Think *only* about those physical activities that you did for at least 10 minutes at a time.

1. During the **last 7 days**, on how many days did you do **vigorous** physical activities like heavy lifting, digging, aerobics, or fast bicycling?

- \_\_\_\_\_ **days per week**  
 No vigorous physical activities → **Skip to question 3**

2. How much time did you usually spend doing **vigorous** physical activities on one of those days?

- \_\_\_\_\_ **hours per day**  
 \_\_\_\_\_ **minutes per day**  
 Don't know/Not sure

Think about all the **moderate** activities that you did in the **last 7 days**. **Moderate** activities refer to activities that take moderate physical effort and make you breathe somewhat harder than normal. Think only about those physical activities that you did for at least 10 minutes at a time.

3. During the **last 7 days**, on how many days did you do **moderate** physical activities like carrying light loads, bicycling at a regular pace, or doubles tennis? Do not include walking.

- \_\_\_\_\_ **days per week**  
 No moderate physical activities → **Skip to question 5**

4. How much time did you usually spend doing **moderate** physical activities on one of those days?

- \_\_\_\_\_ **hours per day**  
 \_\_\_\_\_ **minutes per day**  
 Don't know/Not sure

Think about the time you spent **walking** in the **last 7 days**. This includes at work and at home, walking to travel from place to place, and any other walking that you have done solely for recreation, sport, exercise, or leisure.

5. During the **last 7 days**, on how many days did you **walk** for at least 10 minutes at a time?

- \_\_\_\_\_ **days per week**  
 No walking → **Skip to question 7**

6. How much time did you usually spend **walking** on one of those days?

- \_\_\_\_\_ **hours per day**  
 \_\_\_\_\_ **minutes per day**  
 Don't know/Not sure

The last question is about the time you spent **sitting** on weekdays during the **last 7 days**. Include time spent at work, at home, while doing course work and during leisure time. This may include time spent sitting at a desk, visiting friends, reading, or sitting or lying down to watch television.

7. During the **last 7 days**, how much time did you spend **sitting** on a **week day**?

- \_\_\_\_\_ **hours per day**  
 \_\_\_\_\_ **minutes per day**  
 Don't know/Not sure

**This is the end of the questionnaire, thank you for participating.**



## Patient Specific Functional Scale

Clinician to read and fill in below: Complete at the end of the history and prior to physical examination.

**Initial Assessment:**

I am going to ask you to identify up to three important activities that you are unable to do or are having difficulty with as a result of your cancer diagnosis/treatment. Today, are there any activities that you are unable to do or having difficulty with because of your cancer diagnosis/treatment? (Clinician: show scale to patient and have the patient rate each activity).

**Follow-up Assessments:**

When I assessed you on (state previous assessment date), you told me that you had difficulty with (read all activities from list at a time). Today, do you still have difficulty with: (read and have patient score each item in the list)?

**Patient-specific activity scoring scheme (Point to one number):**

|                            |   |   |   |   |                                                                |   |   |   |   |    |
|----------------------------|---|---|---|---|----------------------------------------------------------------|---|---|---|---|----|
| 0                          | 1 | 2 | 3 | 4 | 5                                                              | 6 | 7 | 8 | 9 | 10 |
| Unable to perform activity |   |   |   |   | Able to perform activity at the same level as before diagnosis |   |   |   |   |    |

T0 Date: / /

T1 Date: / /

| Activity   | T0 | T1 |
|------------|----|----|
| 1          |    |    |
| 2          |    |    |
| 3          |    |    |
| Additional |    |    |
| Total      |    |    |

Total score = sum of the activity scores/number of activities  
 Minimum detectable change (90%CI) for average score = 2 points  
 Minimum detectable change (90%CI) for single activity score = 3 points

PSFS developed by: Stratford, P., Gill, C., Westaway, M., & Binkley, J. (1995). Assessing disability and change on individual patients: a report of a patient specific measure. *Physiotherapy Canada*, 47, 258-263. Reproduced with the permission of the authors.

## Mini Nutritional Assessment

Sex:  Age:  Weight, kg:  Height, cm:  Date:

Complete the screen by filling in the boxes with the appropriate numbers. Total the numbers for the final screening score.

| Screening                                                                                                                                                                                                                                                 |                                                   |
|-----------------------------------------------------------------------------------------------------------------------------------------------------------------------------------------------------------------------------------------------------------|---------------------------------------------------|
| <b>A Has food intake declined over the past 3 months due to loss of appetite, digestive problems, chewing or swallowing difficulties?</b><br>0 = severe decrease in food intake<br>1 = moderate decrease in food intake<br>2 = no decrease in food intake | <input type="checkbox"/>                          |
| <b>B Weight loss during the last 3 months</b><br>0 = weight loss greater than 3 kg (6.6 lbs)<br>1 = does not know<br>2 = weight loss between 1 and 3 kg (2.2 and 6.6 lbs)<br>3 = no weight loss                                                           | <input type="checkbox"/>                          |
| <b>C Mobility</b><br>0 = bed or chair bound<br>1 = able to get out of bed / chair but does not go out<br>2 = goes out                                                                                                                                     | <input type="checkbox"/>                          |
| <b>D Has suffered psychological stress or acute disease in the past 3 months?</b><br>0 = yes      2 = no                                                                                                                                                  | <input type="checkbox"/>                          |
| <b>E Neuropsychological problems</b><br>0 = severe dementia or depression<br>1 = mild dementia<br>2 = no psychological problems                                                                                                                           | <input type="checkbox"/>                          |
| <b>F1 Body Mass Index (BMI) (weight in kg) / (height in m)<sup>2</sup></b> <input type="checkbox"/><br>0 = BMI less than 19<br>1 = BMI 19 to less than 21<br>2 = BMI 21 to less than 23<br>3 = BMI 23 or greater                                          | <input type="checkbox"/>                          |
| IF BMI IS NOT AVAILABLE, REPLACE QUESTION F1 WITH QUESTION F2.<br>DO NOT ANSWER QUESTION F2 IF QUESTION F1 IS ALREADY COMPLETED.                                                                                                                          |                                                   |
| <b>F2 Calf circumference (CC) in cm</b><br>0 = CC less than 31<br>3 = CC 31 or greater                                                                                                                                                                    | <input type="checkbox"/>                          |
| <b>Screening score</b><br>(max. 14 points)                                                                                                                                                                                                                | <input type="checkbox"/> <input type="checkbox"/> |
| <b>12-14 points:</b> <input type="checkbox"/> Normal nutritional status<br><b>8-11 points:</b> <input type="checkbox"/> At risk of malnutrition<br><b>0-7 points:</b> <input type="checkbox"/> Malnourished                                               |                                                   |

Ref. Vellas B, Villars H, Abellan G, et al. *Overview of the MNA® - Its History and Challenges*. J Nutr Health Aging 2006;10:456-465.  
 Rubenstein LZ, Harker JO, Salva A, Guigoz Y, Vellas B. *Screening for Undernutrition in Geriatric Practice: Developing the Short-Form Mini Nutritional Assessment (MNA-SF)*. J. Gerontol 2001;56A: M366-377.  
 Guigoz Y. *The Mini-Nutritional Assessment (MNA®) Review of the Literature - What does it tell us?* J Nutr Health Aging 2006; 10:466-487.  
 Kaiser MJ, Bauer JM, Ramsch C, et al. *Validation of the Mini Nutritional Assessment Short-Form (MNA®-SF): A practical tool for identification of nutritional status*. J Nutr Health Aging 2009; 13:782-788.  
 © Société des Produits Nestlé SA, Trademark Owners.  
 © Société des Produits Nestlé SA 1994, Revision 2009.

### Physical Assessment

|                          |  |                |  |
|--------------------------|--|----------------|--|
| Height (cm)              |  | Blood pressure |  |
| Weight (kg)              |  | Heart rate     |  |
| BMI (kg/m <sup>2</sup> ) |  | SpO2           |  |

### Hand Grip Strength

|      |   |  |       |   |  |                                               |
|------|---|--|-------|---|--|-----------------------------------------------|
| Left | 1 |  | Right | 1 |  | Set-up of dynamometer:<br>Document rung # 1-5 |
|      | 2 |  |       | 2 |  |                                               |
|      | 3 |  |       | 3 |  |                                               |

|                                                              |                                                                                       |
|--------------------------------------------------------------|---------------------------------------------------------------------------------------|
| <b>Timed Up and Go</b><br><br><b>TUG Time:</b> _____ seconds | <b>30 Second Sit to Stand</b><br><br><b>30s STS score:</b> _____ stands in 30 seconds |
|--------------------------------------------------------------|---------------------------------------------------------------------------------------|

### 6 Minute Walking Test

Length of course: \_\_\_\_\_m

| Minute | HR | SpO2 | Distance<br><i>Make a mark for each length walked</i> |
|--------|----|------|-------------------------------------------------------|
| 1      |    |      |                                                       |
| 2      |    |      |                                                       |
| 3      |    |      |                                                       |
| 4      |    |      |                                                       |
| 5      |    |      |                                                       |
| 6      |    |      | Total distance walked:                                |

### Observations during physical assessment:

## Triage Decision Making

### ECOG Status

| GRADE | ECOG PERFORMANCE STATUS                                                                                                                                   |
|-------|-----------------------------------------------------------------------------------------------------------------------------------------------------------|
| 0     | Fully active, able to carry on all pre-disease performance without restriction                                                                            |
| 1     | Restricted in physically strenuous activity but ambulatory and able to carry out work of a light or sedentary nature, e.g., light house work, office work |
| 2     | Ambulatory and capable of all selfcare but unable to carry out any work activities; up and about more than 50% of waking hours                            |
| 3     | Capable of only limited selfcare; confined to bed or chair more than 50% of waking hours                                                                  |
| 4     | Completely disabled; cannot carry on any selfcare; totally confined to bed or chair                                                                       |
| 5     | Dead                                                                                                                                                      |

Participant ECOG score: \_\_\_\_\_

### Pre-Participation Health Screening

Complete steps 1 - 3 below. 1. Clearly circle outcome of American College of Sports Medicine (2015) algorithm:

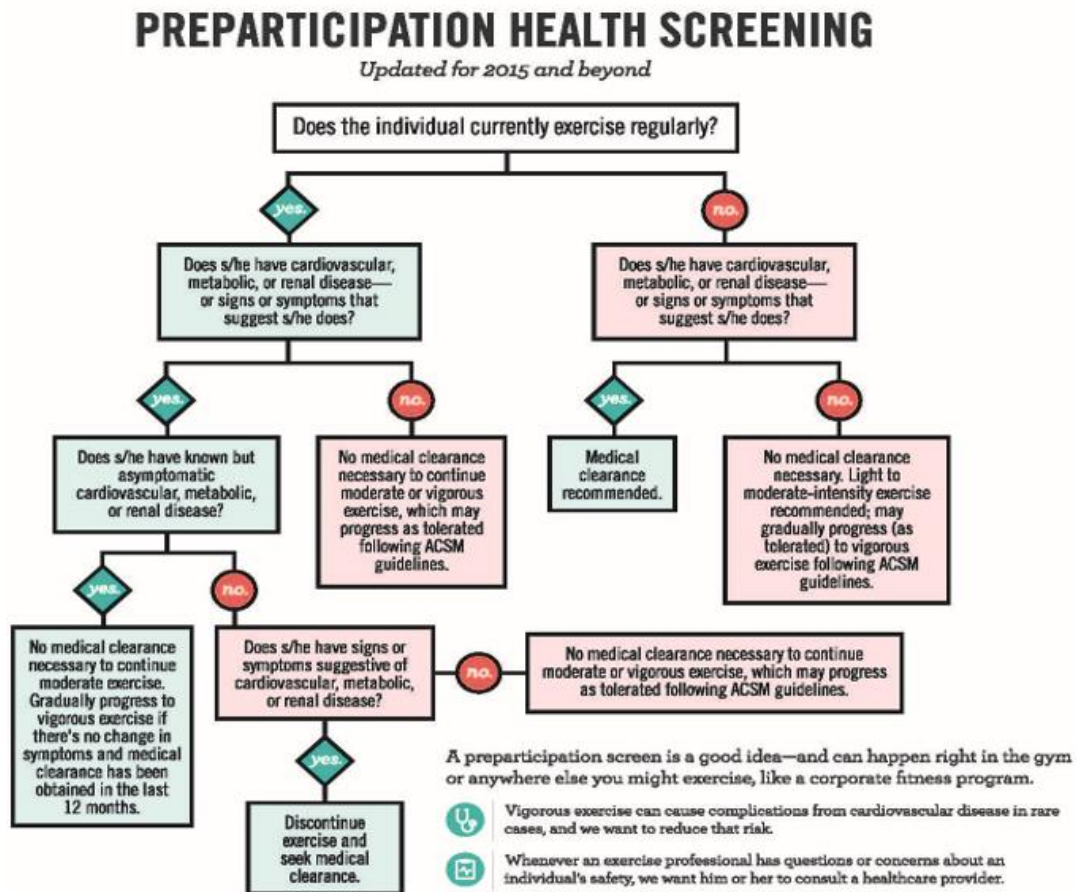

2: Tick appropriate outcome from National Comprehensive Cancer Network triage

| <i>Tick ✓</i> | <b>Description of Patients</b>                                                                                                                                                                               | <b>Evaluation, prescription, and programming recommendations</b>                                                                                   |
|---------------|--------------------------------------------------------------------------------------------------------------------------------------------------------------------------------------------------------------|----------------------------------------------------------------------------------------------------------------------------------------------------|
|               | No comorbidities                                                                                                                                                                                             | No further pre-exercise medical evaluation.<br>Follow general exercise recommendations                                                             |
|               | Peripheral neuropathy, arthritis/musculoskeletal issues, poor bone health (e.g. osteopenia or osteoporosis), lymphoedema                                                                                     | Pre-exercise medical evaluation recommended. Modify general exercise recommendations based on assessments. Consider referral to trained personnel. |
|               | Lung or abdominal surgery, ostomy, cardiopulmonary disease, ataxia, extreme fatigue, severe nutritional deficiencies, worsening/changing physical condition (e.g. lymphoedema exacerbation), bone metastases | Pre-exercise medical evaluation and clearance by a physician before commencing exercise.<br>Referral to trained personnel.                         |

3: Is medical clearance required prior to exercise:  No  Yes

If yes, explain why and what action will be taken:

|  |
|--|
|  |
|--|

## Triage Outcome

**Participant triaged to group:**

| <i>Tick ✓</i> | <b>Group number</b> | <b>Status</b>                                                                                                                                                                  | <b>Exercise prescription</b>                                                            |
|---------------|---------------------|--------------------------------------------------------------------------------------------------------------------------------------------------------------------------------|-----------------------------------------------------------------------------------------|
|               | 1                   | Meeting recommended physical activity levels                                                                                                                                   | Advice and referral to the PERCS website                                                |
|               | 2                   | Not currently meeting recommended physical activity levels; suitable to exercise without health care professional supervision                                                  | Referral to an exercise programme in their local community and to the PERCS website     |
|               | 3                   | Not currently meeting recommended physical activity levels and ECOG $\geq 3$ , or TUG >13.5 seconds or have comorbidities increasing risk of an exercise-induced adverse event | Referral to a specialist physiotherapy service for individual assessment and treatment. |

Document discussion with participant about outcome:

**Goal setting:**

Set SMART goal(s) with participant for the 12-week programme:

**Plan:**

*e.g. Referral to service, website information, referral to clinician*

Action points for participant:

Action points for PERCS team:

  
  
  
  
  
  
  
  
  
  

**Follow up call date:** \_\_\_\_\_

Checklist of measures to be completed at T0:

|                             | Measure                                    | Completed / checked by | Date completed / checked |
|-----------------------------|--------------------------------------------|------------------------|--------------------------|
| <i>During subjective ax</i> | Subjective history                         |                        |                          |
|                             | Patient specific functional scale          |                        |                          |
|                             | Mini nutritional assessment                |                        |                          |
| <i>Physical measures</i>    | Height and weight                          |                        |                          |
|                             | Waist circumference, mid-arm circumference |                        |                          |
|                             | Timed up & go                              |                        |                          |
|                             | 6 minute walking test                      |                        |                          |
|                             | Hand grip strength test                    |                        |                          |
|                             | 30s sit to stand test                      |                        |                          |
| <i>PROMS</i>                | IPAQ                                       |                        |                          |
|                             | Health behaviour & stages of change        |                        |                          |
|                             | EORTC-QLQ-C30                              |                        |                          |
|                             | MFI                                        |                        |                          |
|                             | PHQ-9                                      |                        |                          |
|                             | GAD-7                                      |                        |                          |
| <i>Triage</i>               | ECOG                                       |                        |                          |
|                             | Pre-participation health screening         |                        |                          |
|                             | Triage outcome                             |                        |                          |

## T1 Assessment

Date: / /2023

Participant attended  Yes  No

If no, reason for not attending:

### Subjective History:

*Since T0 assessment:*

Any change or update in medical status?

### Symptoms and Survivorship Issues

Participants' main problem(s) at present:

### Engagement with exercise recommendations:

Participant triaged to level:  1  2  3

Was level changed by team at any point:  Yes  No Details:

Recommended exercise plan:



|                                                                                                                                                                                                                                                          |                                                                                                                                                                                                                                                                                                                                      |
|----------------------------------------------------------------------------------------------------------------------------------------------------------------------------------------------------------------------------------------------------------|--------------------------------------------------------------------------------------------------------------------------------------------------------------------------------------------------------------------------------------------------------------------------------------------------------------------------------------|
| <p><b>Level 1:</b> Any change in activity since T0?</p> <p><input type="checkbox"/> Yes</p> <p><input type="checkbox"/> No</p> <p>Details:</p>                                                                                                           | <p><b>Level 2/3:</b> Did participant attend service they were referred to?</p> <p><input type="checkbox"/> Yes, from T0 – T1</p> <p><input type="checkbox"/> Yes, first session only</p> <p><input type="checkbox"/> Yes, for other time frame:</p> <p><input type="checkbox"/> No, never</p> <p><input type="checkbox"/> Other:</p> |
| <p>Weekly diary returned? Yes <input type="checkbox"/> No</p> <p>Completed? <input type="checkbox"/> Yes <input type="checkbox"/> No</p> <p><i>Review diary &amp; gather missing information as able</i></p>                                             |                                                                                                                                                                                                                                                                                                                                      |
| <p><b>Level 2:</b></p> <p>Exercise delivered by which professional:</p> <p>Describe service:</p> <ul style="list-style-type: none"> <li>• Location</li> <li>• Frequency</li> <li>• Content</li> <li>• Cost (direct/indirect)</li> <li>• Other</li> </ul> |                                                                                                                                                                                                                                                                                                                                      |
| <p><b>Level 3:</b></p> <p>SJH or other physio:</p> <p>Date of contact from physio:</p> <p>Date of first appointment:</p>                                                                                                                                 |                                                                                                                                                                                                                                                                                                                                      |

ACSM Recommended Exercise Guidelines (T1)

|                                                                                                                                                                                                                                                                                                                                                                                                                                                                                                                                                                                              |
|----------------------------------------------------------------------------------------------------------------------------------------------------------------------------------------------------------------------------------------------------------------------------------------------------------------------------------------------------------------------------------------------------------------------------------------------------------------------------------------------------------------------------------------------------------------------------------------------|
| <p><b>Aerobic:</b></p> <p><i>“How many days in the past week have you performed physical activity where your heart beats faster and your breathing is harder than normal for 30 minutes or more?”</i></p> <p>Days per week engaged in ≥ 30 mins moderate intensity exercise: _____</p> <p>Details of exercise: _____</p> <p><b>Resistance:</b></p> <p><i>“How many days during the past week have you performed physical activity to increase muscle strength such as lifting weights?”</i></p> <p>Days per week engaged in resistance exercise: _____</p> <p>Details of exercise: _____</p> |
|----------------------------------------------------------------------------------------------------------------------------------------------------------------------------------------------------------------------------------------------------------------------------------------------------------------------------------------------------------------------------------------------------------------------------------------------------------------------------------------------------------------------------------------------------------------------------------------------|

|                                                                                                                                                                                                                            |
|----------------------------------------------------------------------------------------------------------------------------------------------------------------------------------------------------------------------------|
| <p><b>Participant is meeting the recommended exercise guidelines:</b></p> <p><input type="checkbox"/> Yes   <input type="checkbox"/> No</p> <p>(Aerobic <math>\geq</math> 3 days; resistance <math>\geq</math> 2 days)</p> |
|----------------------------------------------------------------------------------------------------------------------------------------------------------------------------------------------------------------------------|

**Goal:**

|                                                                                                                             |
|-----------------------------------------------------------------------------------------------------------------------------|
| <p>Participant's goal (fill from T0 ax):</p><br><br><p>Participant's reported progress with goal at T1:</p><br><br><br><br> |
|-----------------------------------------------------------------------------------------------------------------------------|

**Patient Specific Functional Scale**

Complete T1 on page 8 of this document

## Mini Nutritional Assessment

|      |                                          |      |                                          |             |                                          |             |                                          |       |                                          |
|------|------------------------------------------|------|------------------------------------------|-------------|------------------------------------------|-------------|------------------------------------------|-------|------------------------------------------|
| Sex: | <input style="width: 90%;" type="text"/> | Age: | <input style="width: 90%;" type="text"/> | Weight, kg: | <input style="width: 90%;" type="text"/> | Height, cm: | <input style="width: 90%;" type="text"/> | Date: | <input style="width: 90%;" type="text"/> |
|------|------------------------------------------|------|------------------------------------------|-------------|------------------------------------------|-------------|------------------------------------------|-------|------------------------------------------|

Complete the screen by filling in the boxes with the appropriate numbers. Total the numbers for the final screening score.

| Screening                                                                                                                                                                                                                                                                                                                                                                                      |
|------------------------------------------------------------------------------------------------------------------------------------------------------------------------------------------------------------------------------------------------------------------------------------------------------------------------------------------------------------------------------------------------|
| <p><b>A Has food intake declined over the past 3 months due to loss of appetite, digestive problems, chewing or swallowing difficulties?</b><br/>                     0 = severe decrease in food intake<br/>                     1 = moderate decrease in food intake<br/>                     2 = no decrease in food intake <span style="float: right;"><input type="checkbox"/></span></p> |
| <p><b>B Weight loss during the last 3 months</b><br/>                     0 = weight loss greater than 3 kg (6.6 lbs)<br/>                     1 = does not know<br/>                     2 = weight loss between 1 and 3 kg (2.2 and 6.6 lbs)<br/>                     3 = no weight loss <span style="float: right;"><input type="checkbox"/></span></p>                                     |
| <p><b>C Mobility</b><br/>                     0 = bed or chair bound<br/>                     1 = able to get out of bed / chair but does not go out<br/>                     2 = goes out <span style="float: right;"><input type="checkbox"/></span></p>                                                                                                                                     |
| <p><b>D Has suffered psychological stress or acute disease in the past 3 months?</b><br/>                     0 = yes      2 = no <span style="float: right;"><input type="checkbox"/></span></p>                                                                                                                                                                                              |
| <p><b>E Neuropsychological problems</b><br/>                     0 = severe dementia or depression<br/>                     1 = mild dementia<br/>                     2 = no psychological problems <span style="float: right;"><input type="checkbox"/></span></p>                                                                                                                           |
| <p><b>F1 Body Mass Index (BMI) (weight in kg) / (height in m)<sup>2</sup></b> <input type="checkbox"/><br/>                     0 = BMI less than 19<br/>                     1 = BMI 19 to less than 21<br/>                     2 = BMI 21 to less than 23<br/>                     3 = BMI 23 or greater <span style="float: right;"><input type="checkbox"/></span></p>                    |

IF BMI IS NOT AVAILABLE, REPLACE QUESTION F1 WITH QUESTION F2.  
 DO NOT ANSWER QUESTION F2 IF QUESTION F1 IS ALREADY COMPLETED.

|                                                                                                                                                                                                       |
|-------------------------------------------------------------------------------------------------------------------------------------------------------------------------------------------------------|
| <p><b>F2 Calf circumference (CC) in cm</b><br/>                     0 = CC less than 31<br/>                     3 = CC 31 or greater <span style="float: right;"><input type="checkbox"/></span></p> |
|-------------------------------------------------------------------------------------------------------------------------------------------------------------------------------------------------------|

|                                                                                                                                                                                                                                                                                                                                                                                 |
|---------------------------------------------------------------------------------------------------------------------------------------------------------------------------------------------------------------------------------------------------------------------------------------------------------------------------------------------------------------------------------|
| <p><b>Screening score</b> <span style="float: right;"><input type="checkbox"/> <input type="checkbox"/></span><br/>                 (max. 14 points)</p> <p><b>12-14 points:</b> <input type="checkbox"/> Normal nutritional status<br/> <b>8-11 points:</b> <input type="checkbox"/> At risk of malnutrition<br/> <b>0-7 points:</b> <input type="checkbox"/> Malnourished</p> |
|---------------------------------------------------------------------------------------------------------------------------------------------------------------------------------------------------------------------------------------------------------------------------------------------------------------------------------------------------------------------------------|

### Physical Assessment

|                          |  |                |  |
|--------------------------|--|----------------|--|
| Height (cm)              |  | Blood pressure |  |
| Weight (kg)              |  | Heart rate     |  |
| BMI (kg/m <sup>2</sup> ) |  | SpO2           |  |

### Hand Grip Strength

|      |   |  |       |   |  |
|------|---|--|-------|---|--|
| Left | 1 |  | Right | 1 |  |
|      | 2 |  |       | 2 |  |
|      | 3 |  |       | 3 |  |

|                                                   |                                                                            |
|---------------------------------------------------|----------------------------------------------------------------------------|
| <b>Timed Up and Go</b><br>TUG Time: _____ seconds | <b>30 Second Sit to Stand</b><br>30s STS score: _____ stands in 30 seconds |
|---------------------------------------------------|----------------------------------------------------------------------------|

### 6 Minute Walking Test

Length of course: \_\_\_\_\_m

| Minute | HR | SpO2 | Distance<br><i>Make a mark for each length walked</i> |
|--------|----|------|-------------------------------------------------------|
| 1      |    |      |                                                       |
| 2      |    |      |                                                       |
| 3      |    |      |                                                       |
| 4      |    |      |                                                       |
| 5      |    |      |                                                       |
| 6      |    |      | Total distance walked:                                |

Observations during physical assessment:

### ECOG Status

| GRADE | ECOG PERFORMANCE STATUS                                                                                                                                   |
|-------|-----------------------------------------------------------------------------------------------------------------------------------------------------------|
| 0     | Fully active, able to carry on all pre-disease performance without restriction                                                                            |
| 1     | Restricted in physically strenuous activity but ambulatory and able to carry out work of a light or sedentary nature, e.g., light house work, office work |
| 2     | Ambulatory and capable of all selfcare but unable to carry out any work activities; up and about more than 50% of waking hours                            |
| 3     | Capable of only limited selfcare; confined to bed or chair more than 50% of waking hours                                                                  |
| 4     | Completely disabled; cannot carry on any selfcare; totally confined to bed or chair                                                                       |
| 5     | Dead                                                                                                                                                      |

Participant ECOG score: \_\_\_\_\_

### Checklist of measures to be completed at T1:

|                             | <b>Measure</b>                             | <b>Completed / checked by</b> | <b>Date completed / checked</b> |
|-----------------------------|--------------------------------------------|-------------------------------|---------------------------------|
| <i>During subjective ax</i> | Subjective history                         |                               |                                 |
|                             | Patient specific functional scale          |                               |                                 |
|                             | Mini nutritional assessment                |                               |                                 |
| <i>Physical measures</i>    | Height and weight                          |                               |                                 |
|                             | Waist circumference, mid-arm circumference |                               |                                 |
|                             | Timed up & go                              |                               |                                 |
|                             | 6-minute walking test                      |                               |                                 |
|                             | Hand grip strength test                    |                               |                                 |
|                             | 30s sit to stand test                      |                               |                                 |
| <i>PROMS</i>                | IPAQ                                       |                               |                                 |
|                             | Health behaviour & stages of change        |                               |                                 |
|                             | EORTC-QLQ-C30                              |                               |                                 |
|                             | MFI                                        |                               |                                 |
|                             | PHQ-9                                      |                               |                                 |
|                             | GAD-7                                      |                               |                                 |
|                             | Service evaluation                         |                               |                                 |
| <i>Other</i>                | ECOG                                       |                               |                                 |

## Incident Tracking

Did an incident occur during the assessments?

No

Yes, a mild incident (such as transient dizziness or headache)

Date: .....

Description (Please include description of event, treatment, attribution and date issue resolved):

Yes, a severe incident (such as chest pain, fainting)

Date: .....

Description (Please include description of event, treatment, attribution and date issue resolved):

Note: In the case of severe incident, inform the coordinating investigator immediately.

Yes, a serious incident occurred (permanent damage or life-threatening situation)

Date: .....

Description (Please include description of event, treatment, attribution and date issue resolved)

Note: In the case of a serious incident, inform the principal investigator immediately.
